# Supplementary material for: Are transition metal phthalocyanines active for urea synthesis via electrocatalytic coupling of CO2 and N2?
Source: Royal Society of Chemistry journal article supplement (doi:10.1039/d4cp04047c), 2024-11-28
Supplement: d4cp04047c1.pdf [file d4cp04047c1.pdf]

## Supporting Information

# Is transition metal phthalocyanines active for urea synthesis via electrocatalytic coupling of CO<sub>2</sub> and N<sub>2</sub>?

Yungan Huang<sup>a</sup>, Ting Fan<sup>b</sup>, Yongfei Ji<sup>a\*</sup>

<sup>a</sup> School of Chemistry and Chemical Engineering, Guangzhou University, Guangzhou 510006, Guangdong, P. R.China. E-mail: [yongfeiji2018@gzhu.edu.cn](mailto:yongfeiji2018@gzhu.edu.cn)

<sup>b</sup> School of Chemistry and Chemical Engineering, South China University of Technology, Guangzhou 510641, Guangdong, P. R. China.

### Contents

This supplementary information contains the details for the calculation of free energy correction, the optimized structure of CON<sub>2</sub> (Figure S1), projected density of states of CO and N<sub>2</sub> on FePc (Figure S2), energy-decomposition analysis (Figure S3), and all the intermediates for CO-N<sub>2</sub> coupling to urea on Ti, V, Zr and HfPc (Figure S4), and free energy surfaces for CO<sub>2</sub> reduction to CO (Figure S5).

### Free energy corrections

The free energy corrections include

$$\Delta G_{corr} = \Delta G_{ZPE} + \int C_p dT - TS$$

in which ZPE stands for zero-point energy,  $\int C_p dT$  is the enthalpic thermal corrections, and  $-TS$  is the entropy correction. With the vibration frequency calculated with VASP, these three terms were calculated with Atomic Simulation Environment package.

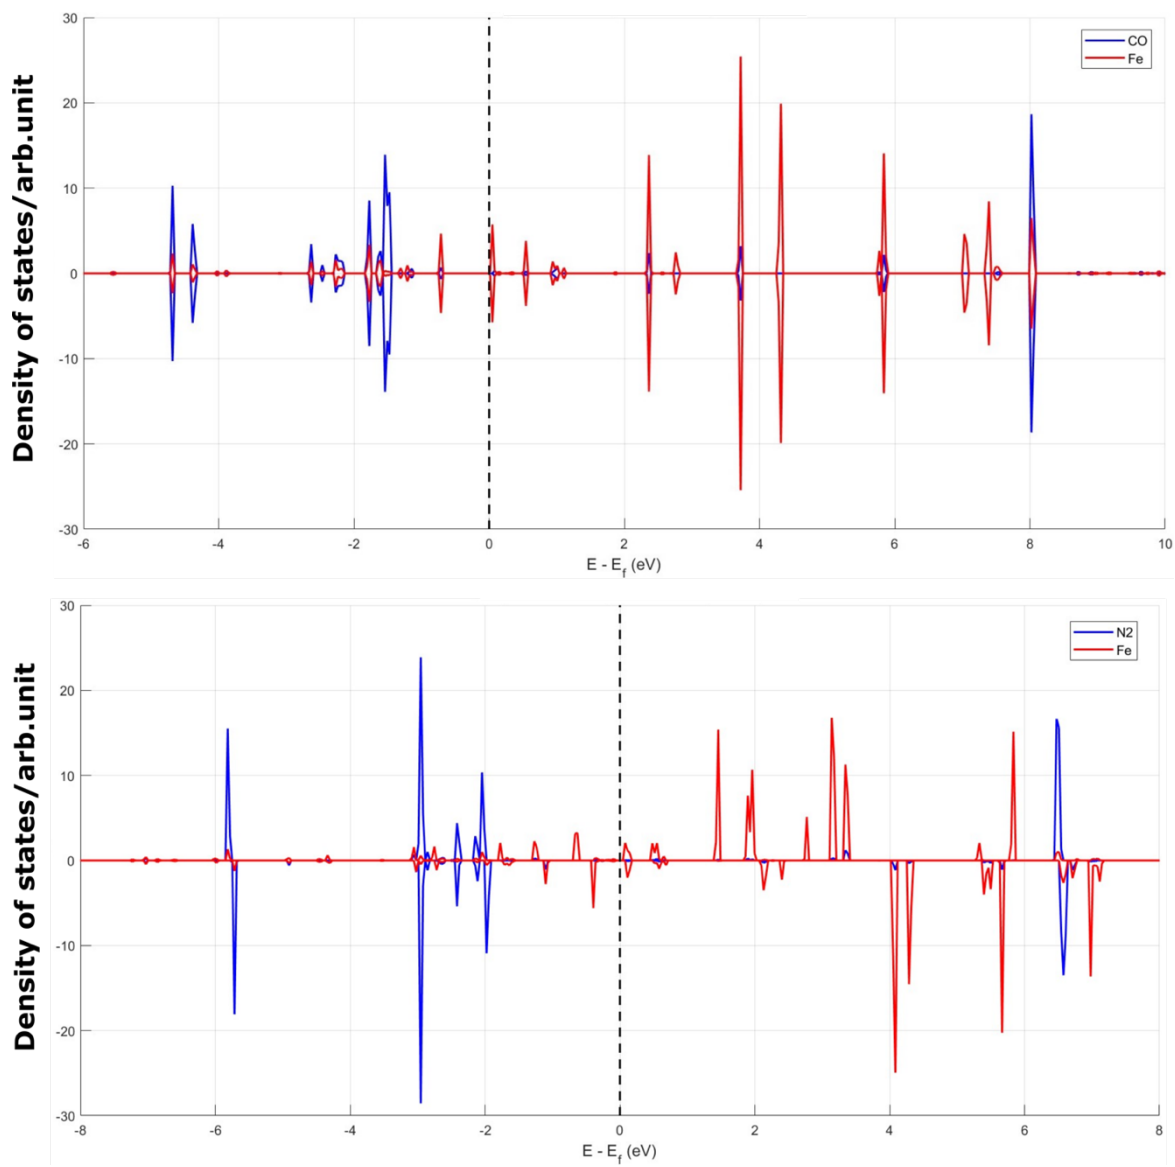

Figure S1. The projected density of states of CO and N2 on FePc.  $E_f$  is the Fermi energy.

## Energy-decomposition analysis

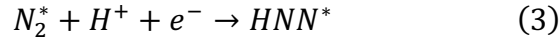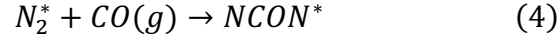

We decompose  $\Delta G_3$  at 0.0  $V_{RHE}$  into the reaction free energy of the following reactions:

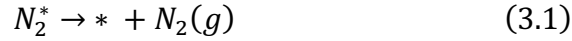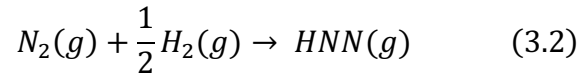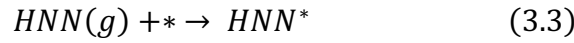

Note that the energy of  $(H^+ + e^-)$  is related to that of  $H_2(g)$  in reaction (3.2). Similarly,  $\Delta G_4$  can be decomposed into reaction free energy of reaction 3.1 and 4.2, 4.3

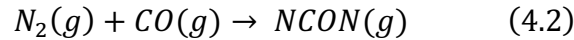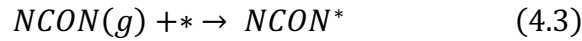

Then:

$$\Delta G_4 - \Delta G_3 = (\Delta G_{4.2} - \Delta G_{3.2}) + (\Delta G_{4.3} - \Delta G_{3.3}) = \Delta G_g + \Delta G_{ads}$$

In which  $\Delta G_g = G_{4.2} - \Delta G_{3.2} = 1.17 \text{ eV}$  is constant for all the MPcs.  $\Delta G_{ads}$  is the difference in the adsorption free energy of NCON and HNN ( $\Delta G_{ads}(NCON) - \Delta G_{ads}(HNN)$ ).  $\Delta G_g$  is very high probably because the formation of NCON(g) needs to break all the triple bonds in  $N_2$ , while the formation of HNN only needs to break one of the triple bonds. Therefore, only when  $\Delta G_{ads}$  is lower than -1.17 eV, CO- $N_2$  coupling becomes more favorable than  $N_2$  reduction. As shown in Figure S3, although  $\Delta G_{4.3}$ , i.e.  $\Delta G_{ads}(NCON)$  is always lower than  $\Delta G_{4.3}$  i.e.  $\Delta G_{ads}(HNN)$ , the difference is only lower than -1.17 eV in the scenarios of strong adsorption. This is because  $\Delta G_{ads}(NCON)$  scale with  $\Delta G_{ads}(HNN)$  and the slope is larger than one, therefore,  $\Delta G_{ads}$  also increases with  $\Delta G_{ads}(HNN)$ .  $\Delta G_{ads}$  then becomes negative than -1.17

eV when  $\Delta G_{ads}(\text{HNN})$  is low enough. Therefore, the reason that TiPc, VPc, ZrPc, and HfPc prefers NCON is that the formation of NCON requires too much energy input which only can be compensated when the adsorption of NCON is strong enough. The key here is the slop for the  $\Delta G_{ads}(\text{NCON})$  scaling line is larger than 1, and the reason is that NCON has more dangling bonds (J. K. Nørskov, et al., Physical Reviews Letters 99, 016105, 2007).

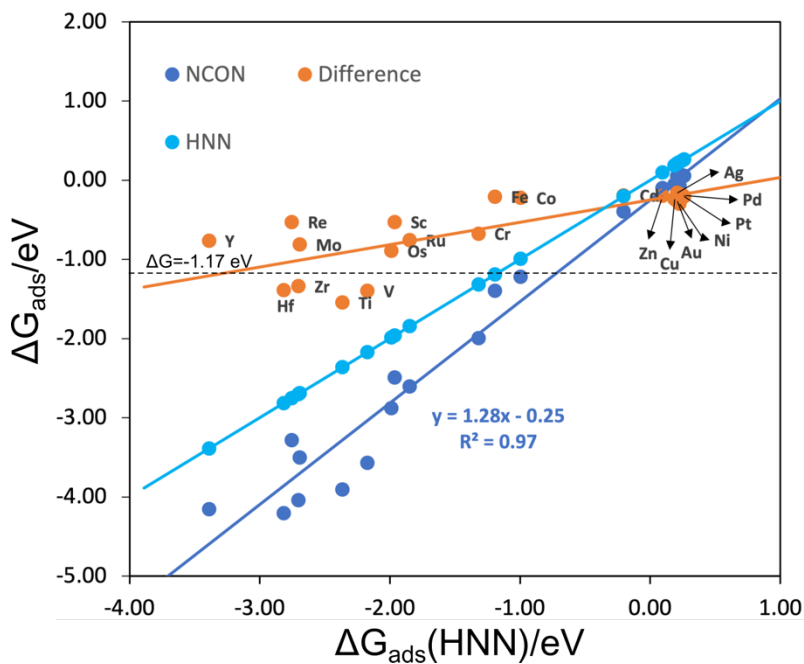

Figure S2 the adsorption free energies of NCON and HNN, and their difference. The dashed horizontal line is where the difference is equal to -1.17 eV.

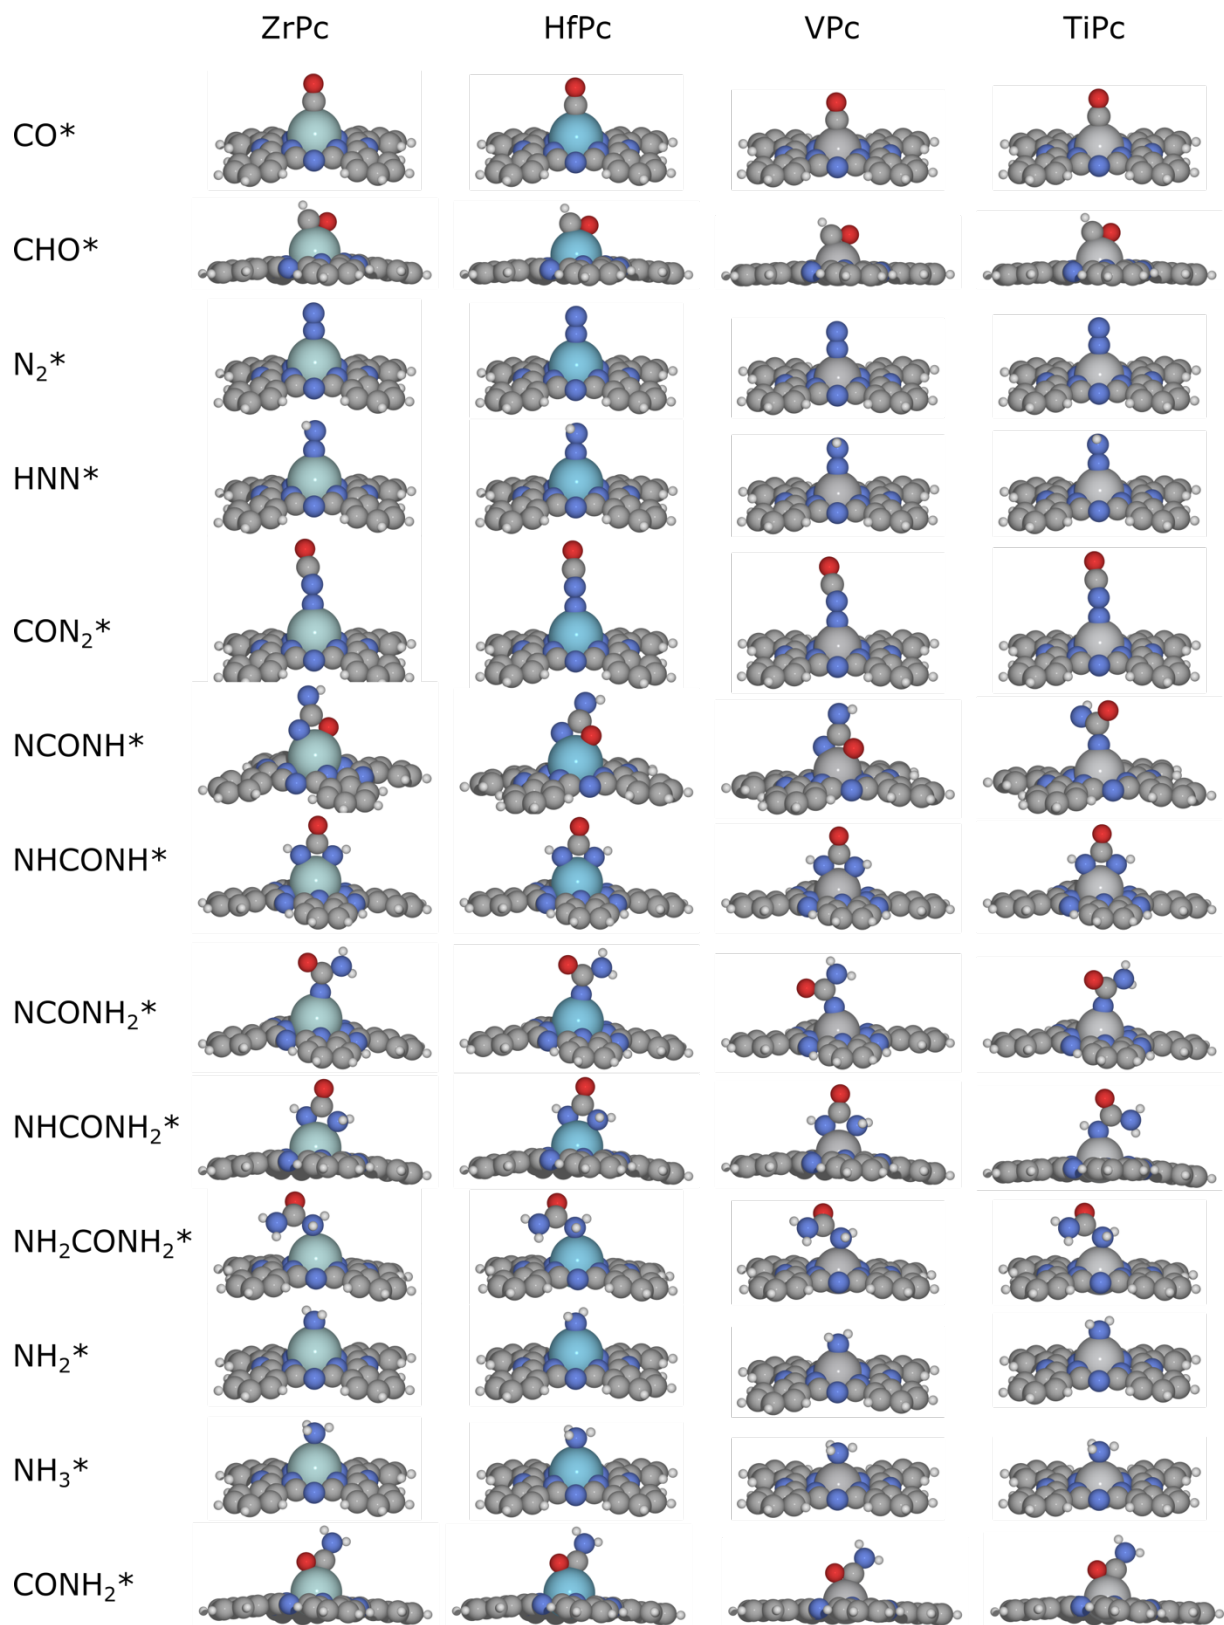

Figure S3, the optimized structures of the intermediates on Ti, V, Zr, and HfPc.

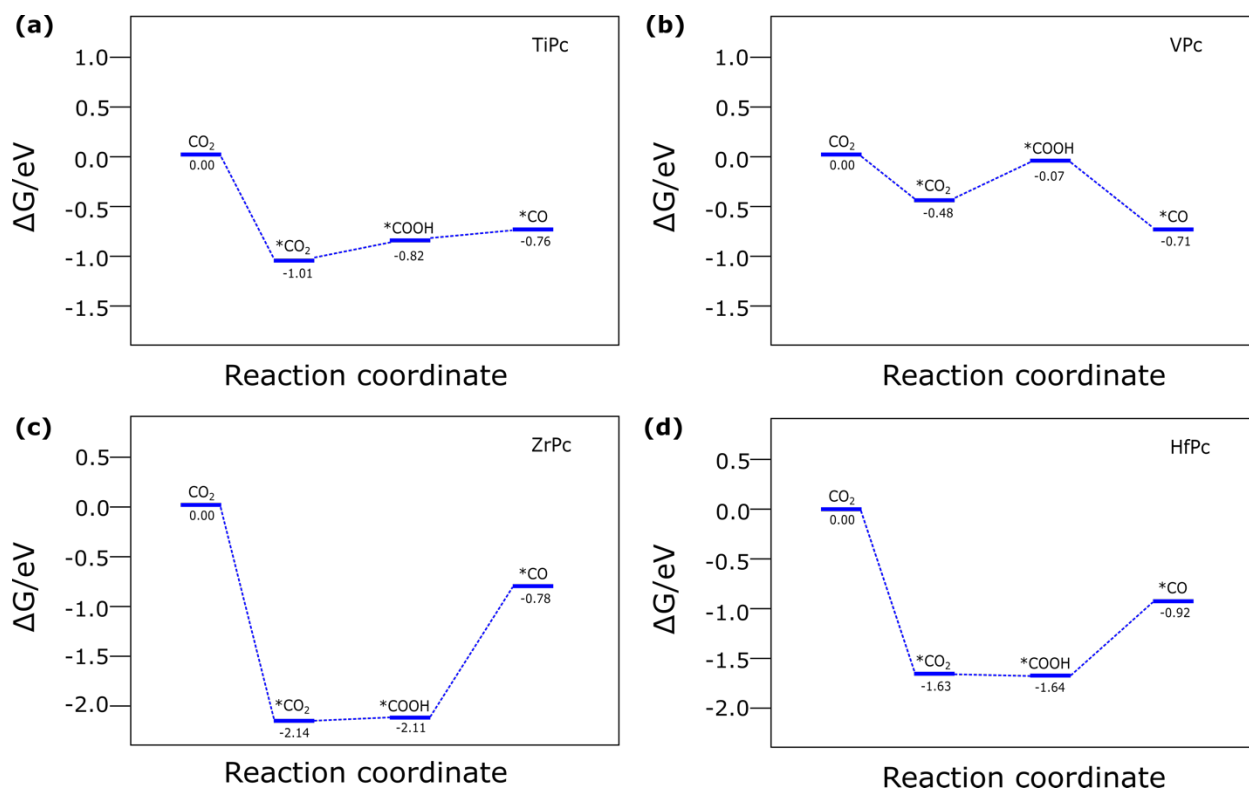

Figure S4. Free energy surfaces for CO<sub>2</sub> reduction to CO\* on TiPc, VPc, ZrPc, and HfPc.

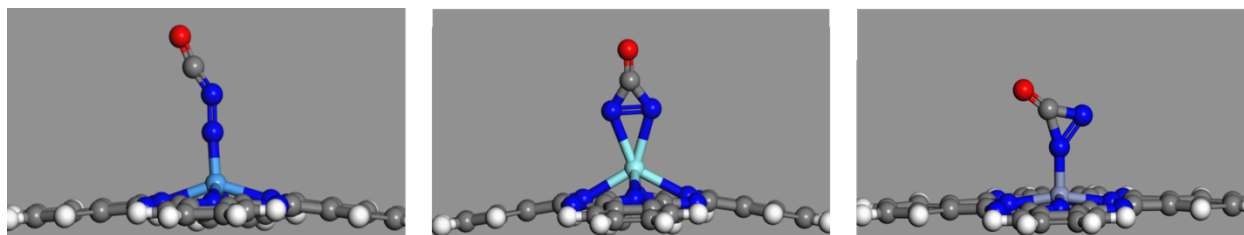

Figure S5, three adsorption structures of CO<sub>2</sub> on MPC, from left to right: linear,  $\eta_2$  and  $\eta_1$ .

Table S1 The data for Figure 2-3 ( $G_{\text{ads}}(\text{N}_2)$  in Table S2)

| Met<br>al | G(CO2<br>) | Gads(CO<br>) | G(CO*)<br>) | G(CHO<br>) | G(*NCO<br>N) | Delta_G<br>1 | Delta_G<br>2 | Dlelta_G<br>3 | Delta_G<br>4 |
|-----------|------------|--------------|-------------|------------|--------------|--------------|--------------|---------------|--------------|
| Ag        | 0.02       | 0.61         | 0.82        | 2.04       | 3.82         | 1.22         | 3.01         | 2.38          | 3.22         |
| Au        | 0.03       | 0.61         | 0.82        | 2.10       | 3.72         | 1.28         | 2.90         | 2.38          | 3.11         |
| Cd        | -0.18      | 0.45         | 0.66        | 1.47       | 3.38         | 0.82         | 2.72         | 2.17          | 2.97         |
| Co        | -0.04      | -0.19        | 0.02        | -0.17      | 2.55         | -0.19        | 2.54         | 1.40          | 2.17         |
| Cr        | 0.00       | -0.03        | 0.18        | 0.54       | 1.78         | 0.36         | 1.60         | 0.88          | 1.20         |
| Cu        | 0.02       | 0.56         | 0.77        | 1.90       | 3.72         | 1.13         | 2.95         | 2.36          | 3.12         |
| Fe        | -0.02      | -0.91        | -0.70       | 0.15       | 2.40         | 0.85         | 3.10         | 1.35          | 2.17         |
| Hf        | -2.18      | -1.67        | -1.46       | -1.75      | -0.98        | -0.29        | 0.48         | 1.14          | 0.20         |
| Ir        | -0.01      | -0.37        | -0.16       | -0.87      | 2.82         | -0.71        | 2.98         | 0.75          | 2.15         |
| Mn        | -0.03      | -0.52        | -0.31       | 0.38       | 2.22         | 0.70         | 2.54         | 1.20          | 1.69         |
| Mo        | -0.51      | -1.13        | -0.92       | -0.43      | 0.27         | 0.49         | 1.19         | 0.31          | 0.49         |
| Nb        | -1.46      | -1.41        | -1.20       | -1.12      | -0.55        | 0.07         | 0.65         | 0.38          | 0.05         |
| Ni        | 0.00       | 0.56         | 0.77        | 1.64       | 3.70         | 0.87         | 2.93         | 2.40          | 3.09         |
| Os        | -0.25      | -2.26        | -2.05       | -0.82      | 0.89         | 1.23         | 2.94         | 1.37          | 1.47         |
| Pd        | 0.00       | 0.58         | 0.79        | 2.01       | 3.83         | 1.22         | 3.04         | 2.42          | 3.22         |
| Pt        | -0.01      | 0.58         | 0.79        | 1.97       | 3.83         | 1.18         | 3.04         | 2.43          | 3.22         |
| Re        | -0.51      | -2.09        | -1.88       | -0.44      | 0.49         | 1.44         | 2.37         | 0.62          | 1.08         |
| Rh        | -0.02      | -0.28        | -0.07       | -0.74      | 2.85         | -0.66        | 2.92         | 0.95          | 2.35         |
| Ru        | -0.07      | -2.02        | -1.81       | -0.59      | 1.17         | 1.22         | 2.98         | 1.50          | 1.74         |
| Sc        | -0.55      | -0.29        | -0.08       | -0.30      | 1.28         | -0.22        | 1.36         | 0.88          | 1.34         |
| Ta        | -1.52      | -1.51        | -1.30       | -1.43      | -0.68        | -0.13        | 0.62         | 0.29          | -0.03        |
| Ti        | -1.01      | -0.97        | -0.76       | -0.61      | -0.14        | 0.15         | 0.63         | 0.91          | 0.36         |
| V         | -0.48      | -0.92        | -0.71       | -0.22      | 0.18         | 0.49         | 0.90         | 1.01          | 0.59         |
| W         | -0.89      | -1.66        | -1.45       | -0.94      | -0.25        | 0.51         | 1.20         | 0.19          | 0.16         |
| Y         | -2.12      | -1.73        | -1.52       | -1.77      | -0.38        | -0.25        | 1.14         | 0.92          | 1.15         |
| Zn        | 0.04       | 0.52         | 0.73        | 1.88       | 3.67         | 1.14         | 2.94         | 2.29          | 3.09         |
| Zr        | -1.48      | -0.99        | -0.78       | -1.05      | -0.27        | -0.27        | 0.50         | 0.59          | 0.24         |

Tabel S2 data for Figure 6

| Metal | Gads(N2) | G(HNN) | G(NH2) | G(NH3) | G(HNN)-<br>G(N2) | G(NH3)-<br>G(NH2) | Gads(NH2) | Gads(CONH2) |
|-------|----------|--------|--------|--------|------------------|-------------------|-----------|-------------|
| Ag    | 0.39     | 2.78   | 1.66   | -0.48  | 2.34             | -2.13             | 0.34      | 0.20        |
| Au    | 0.40     | 2.78   | 1.59   | -0.48  | 2.33             | -2.07             | 0.27      | 0.25        |
| Cd    | 0.20     | 2.36   | 0.64   | -1.29  | 2.12             | -1.93             | -0.68     | -0.40       |
| Co    | 0.17     | 1.57   | 0.17   | -1.06  | 1.35             | -1.23             | -1.15     | -1.75       |
| Cr    | 0.37     | 1.25   | -0.30  | -0.76  | 0.84             | -0.46             | -1.62     | -1.25       |
| Cu    | 0.39     | 2.75   | 1.51   | -0.54  | 2.32             | -2.06             | 0.20      | 0.09        |
| Fe    | 0.02     | 1.38   | -0.09  | -0.95  | 1.33             | -0.86             | -1.41     | -1.48       |
| Hf    | -1.39    | -0.25  | -2.95  | -1.97  | 0.55             | 0.98              | -4.27     | -3.47       |
| Ir    | 0.46     | 1.20   | -0.38  | -0.88  | 0.70             | -0.51             | -1.69     | -2.47       |
| Mn    | 0.32     | 1.53   | 0.05   | -0.94  | 1.16             | -0.98             | -1.27     | -1.27       |
| Mo    | -0.44    | -0.12  | -1.57  | -1.32  | 0.27             | 0.25              | -2.89     | -2.00       |
| Nb    | -0.81    | -0.43  | -2.42  | -1.64  | 0.22             | 0.78              | -3.73     | -3.00       |
| Ni    | 0.40     | 2.79   | 1.47   | -0.39  | 2.35             | -1.86             | 0.15      | 0.00        |
| Os    | -0.79    | 0.58   | -1.10  | -0.89  | 1.33             | 0.20              | -2.41     | -2.43       |
| Pd    | 0.40     | 2.82   | 1.64   | -0.35  | 2.37             | -1.99             | 0.32      | 0.23        |
| Pt    | 0.40     | 2.83   | 1.63   | -0.31  | 2.38             | -1.95             | 0.32      | 0.24        |
| Re    | -0.80    | -0.19  | -1.67  | -0.93  | 0.57             | 0.73              | -2.98     | -2.39       |
| Rh    | 0.29     | 1.24   | -0.30  | -1.03  | 0.89             | -0.73             | -1.62     | -2.34       |
| Ru    | -0.78    | 0.72   | -0.88  | -1.67  | 1.46             | -0.79             | -2.20     | -2.23       |
| Sc    | -0.27    | 0.60   | -1.84  | -1.74  | 0.83             | 0.10              | -3.16     | -2.50       |
| Ta    | -0.86    | -0.57  | -2.50  | -1.67  | 0.25             | 0.83              | -3.82     | -3.31       |
| Ti    | -0.71    | 0.20   | -2.09  | -1.87  | 0.87             | 0.22              | -3.41     | -2.66       |
| V     | -0.61    | 0.40   | -1.72  | -1.77  | 0.95             | -0.05             | -3.04     | -2.19       |
| W     | -0.62    | -0.43  | -2.20  | -1.36  | 0.15             | 0.84              | -3.52     | -2.30       |
| Y     | -1.74    | -0.82  | -3.27  | -3.14  | 0.87             | 0.13              | -4.59     | -4.01       |
| Zn    | 0.37     | 2.66   | 1.21   | -0.91  | 2.25             | -2.12             | -0.10     | 0.00        |
| Zr    | -0.72    | -0.13  | -2.69  | -1.85  | 0.54             | 0.84              | -4.01     | -3.26       |
